# Supplementary material for: Mentored implementation to initiate a diabetes program in an underserved community: a pilot study
Source: HighWire-hosted journal article supplement (doi:10.1136/bmjdrc-2021-002320), 2021-08-01
Supplement: bmjdrc-2021-002320supp001_data_supplement.pdf [file bmjdrc-2021-002320supp001_data_supplement.pdf]

| Appendix. Baseline to month-6 survey data by study phase and arm                                                                                                   |                        |               |                        |               |                      |                      |               |       |
|--------------------------------------------------------------------------------------------------------------------------------------------------------------------|------------------------|---------------|------------------------|---------------|----------------------|----------------------|---------------|-------|
| Variable                                                                                                                                                           | PHASE 1 (N=37)         |               |                        |               | p-value <sup>a</sup> | PHASE 2 (n=22)       |               |       |
|                                                                                                                                                                    | n (%) or mean $\pm$ SD |               | n (%) or mean $\pm$ SD |               |                      | p-value <sup>b</sup> |               |       |
|                                                                                                                                                                    | Intervention           | Control       | Mo-0                   | Mo-6          |                      |                      |               |       |
|                                                                                                                                                                    | Mo-0                   | Mo-6          | Mo-1                   | Mo-6          | Mo-0                 | Mo-6                 |               |       |
| <b>Relaxation (n/week)</b>                                                                                                                                         | 1.8 $\pm$ 2.5          | 1.9 $\pm$ 2.3 | 2.4 $\pm$ 3.2          | 2.4 $\pm$ 2.8 | 0.748                | 2.7 $\pm$ 2.9        | 3.7 $\pm$ 2.1 | 0.202 |
| Relaxation type <sup>c</sup>                                                                                                                                       |                        |               |                        |               |                      |                      |               |       |
| <i>Exercise, outdoors</i>                                                                                                                                          | 4.0 (18.2)             | 1.5 (6.8)     | 3.5 (23.3)             | 5.5 (16.1)    |                      | 6.5 (36.1)           | 9.5 (52.8)    |       |
| <i>Pray/meditate</i>                                                                                                                                               | 4.0 (18.2)             | 2.5 (11.4)    | 2.0 (13.3)             | 0.0 (0.0)     |                      | 1 (5.6)              | 3.5 (19.4)    |       |
| <i>Sleep/rest, music</i>                                                                                                                                           | 5.0 (22.7)             | 6.0 (27.3)    | 4.5 (30.0)             | 2.5 (16.7)    |                      | 3.5 (19.4)           | 2 (11.1)      |       |
| <i>None</i>                                                                                                                                                        | 9.0 (40.9)             | 6.0 (27.3)    | 5.0 (33.3)             | 7 (46.7)      |                      | 5 (27.8)             | 0 (0.0)       |       |
| <i>Unknown</i>                                                                                                                                                     | 0.0 (0.0)              | 6.0 (27.3)    | 0.0 (0.0)              | 0.0 (0.0)     |                      | 2 (11.1)             | 3 (16.7)      |       |
| <b>Home Glucose monitoring (5-point Likert Scale)<sup>d</sup></b>                                                                                                  |                        |               |                        |               |                      |                      |               |       |
| Helps control diabetes                                                                                                                                             | n/a                    | 4.8 $\pm$ 0.3 | n/a                    |               |                      | n/a                  | 4.7 $\pm$ 0.7 | n/a   |
| No/minimal aversion                                                                                                                                                | n/a                    | 4.6 $\pm$ 0.4 | n/a                    |               |                      | n/a                  | 4.3 $\pm$ 1.2 | n/a   |
| <b>Spirituality, social support, and health (5-point Likert Scale)<sup>32</sup></b>                                                                                |                        |               |                        |               |                      |                      |               |       |
| Religion is important                                                                                                                                              | 4.5 $\pm$ 1.0          | 4.9 $\pm$ 0.3 | 4.7 $\pm$ 0.6          | 4.6 $\pm$ 1.1 | 0.195                | 4.7 $\pm$ 1.0        | 4.6 $\pm$ 0.6 | 0.679 |
| My spiritual beliefs help in difficult times                                                                                                                       | 4.5 $\pm$ 1.1          | 4.8 $\pm$ 0.4 | 4.7 $\pm$ 0.6          | 4.6 $\pm$ 1.1 | 0.208                | 4.6 $\pm$ 1.0        | 4.4 $\pm$ 0.6 | 0.602 |
| Spirituality influences caring for my diabetes                                                                                                                     | 3.6 $\pm$ 1.1          | 4.6 $\pm$ 0.7 | 4.5 $\pm$ 0.6          | 4.7 $\pm$ 0.9 | 0.105                | 4.7 $\pm$ 0.8        | 4.1 $\pm$ 1.1 | 0.076 |
| I am part of a spiritual Community/religion                                                                                                                        | 3.9 $\pm$ 1.0          | 4.3 $\pm$ 0.9 | 4.2 $\pm$ 1.0          | 4.3 $\pm$ 1.5 | 0.791                | 4.1 $\pm$ 1.6        | 4.1 $\pm$ 1.0 | 1.0   |
| My spiritual community supports/helps me                                                                                                                           | 3.4 $\pm$ 1.3          | 4.0 $\pm$ 0.9 | 3.8 $\pm$ 1.3          | 3.9 $\pm$ 1.7 | 0.546                | 3.9 $\pm$ 1.7        | 3.5 $\pm$ 1.4 | 0.451 |
| I have people in life that love me                                                                                                                                 | 4.8 $\pm$ 1.0          | 4.9 $\pm$ 0.3 | 4.7 $\pm$ 1.1          | 4.5 $\pm$ 1.1 | 0.467                | 4.8 $\pm$ 1.0        | 4.6 $\pm$ 0.9 | 0.581 |
| I have a social circle that helps me                                                                                                                               | 4.5 $\pm$ 0.7          | 4.6 $\pm$ 0.7 | 4.5 $\pm$ 1.1          | 4.5 $\pm$ 0.9 | 0.740                | 4.6 $\pm$ 0.9        | 4.7 $\pm$ 0.5 | 0.551 |
| My health is good                                                                                                                                                  | 3.9 $\pm$ 1.1          | 4.4 $\pm$ 1.0 | 4.1 $\pm$ 0.9          | 4.2 $\pm$ 0.9 | 0.167                | 4.0 $\pm$ 1.3        | 4.5 $\pm$ 0.6 | 0.181 |
| Program helped my spirituality/religion <sup>d</sup>                                                                                                               | n/a                    | 4.9 $\pm$ 0.4 | n/a                    |               | n/a                  | n/a                  | 4.7 $\pm$ 0.7 | n/a   |
| <b>Program satisfaction (4-point Likert Scale)<sup>d</sup></b>                                                                                                     |                        |               |                        |               |                      |                      |               |       |
| Met my needs                                                                                                                                                       | n/a                    | 3.8 $\pm$ 0.6 | n/a                    |               | n/a                  | n/a                  | 3.8 $\pm$ 0.4 | n/a   |
| Overall satisfied                                                                                                                                                  | n/a                    | 4.0 $\pm$ 0.4 | n/a                    |               | n/a                  | n/a                  | 3.9 $\pm$ 0.2 | n/a   |
| I would come back                                                                                                                                                  | n/a                    | 4.1 $\pm$ 0.2 | n/a                    |               | n/a                  | n/a                  | 3.9 $\pm$ 0.2 | n/a   |
| <b>Community Health Worker (CHW) satisfaction (10-point Likert Scale)<sup>d,7</sup></b>                                                                            |                        |               |                        |               |                      |                      |               |       |
| Call/text helped me                                                                                                                                                | n/a                    | 9.8 $\pm$ 0.6 | n/a                    |               | n/a                  | n/a                  | 9.9 $\pm$ 0.3 | n/a   |
| Beneficial to my care                                                                                                                                              | n/a                    | 9.9 $\pm$ 0.2 | n/a                    |               | n/a                  | n/a                  | 9.9 $\pm$ 0.2 | n/a   |
| Education helped me                                                                                                                                                | n/a                    | 9.9 $\pm$ 0.3 | n/a                    |               | n/a                  | n/a                  | 9.9 $\pm$ 0.2 | n/a   |
| Would recommend                                                                                                                                                    | n/a                    | 10 $\pm$ 0.0  | n/a                    |               | n/a                  | n/a                  | 10.0 $\pm$ 0  | n/a   |
| Quality of life improved                                                                                                                                           | n/a                    | 9.9 $\pm$ 0.3 | n/a                    |               | n/a                  | n/a                  | 9.9 $\pm$ 0.2 | n/a   |
| <sup>a</sup> Baseline to 6-month changes, between group comparisons                                                                                                |                        |               |                        |               |                      |                      |               |       |
| <sup>b</sup> Baseline to 6-months changes, within group comparisons                                                                                                |                        |               |                        |               |                      |                      |               |       |
| <sup>c</sup> Individuals with $\geq 1$ response, were divided equally to total 1.0 e.g., if answered exercise and pray, 0.5 designated to pray and 0.5 to exercise |                        |               |                        |               |                      |                      |               |       |
| <sup>d</sup> Data gathered only at 6-months and for those participating in the intervention                                                                        |                        |               |                        |               |                      |                      |               |       |
